# Supplementary material for: New Synthetic Nitro-Pyrrolomycins as Promising Antibacterial and Anticancer Agents
Source: Antibiotics (Basel). 2020 May 30;9(6):292. doi: 10.3390/antibiotics9060292 (PMC7345095; doi:10.3390/antibiotics9060292)
Supplement: Supplementary file 1 [file antibiotics-09-00292-s001.pdf]

## New synthetic nitro-pyrrolomycins as promising antibacterial and anticancer agents

Maria Valeria Raimondi <sup>1,†</sup>, Alessandro Presentato <sup>2,†</sup>, Giovanna Li Petri <sup>1,\*</sup>, Miriam Buttacavoli <sup>2</sup>, Agnese Ribaudò <sup>1,3</sup>, Viviana De Caro <sup>1</sup>, Rosa Alduina <sup>2,\*</sup> and Patrizia Cancemi <sup>2</sup>

<sup>1</sup> Department of Biological, Chemical and Pharmaceutical Sciences and Technologies (STEBICEF), University of Palermo, via Archirafi 32, 90123 Palermo, Italy; mariavaleria.raimondi@unipa.it (M.V.R.); giovanna.lipetri@unipa.it (G.L.P.); viviana.decaro@unipa.it (V.D.C)

<sup>2</sup> Department of Biological, Chemical and Pharmaceutical Sciences and Technologies (STEBICEF), University of Palermo, viale delle Scienze, Building 16, 90128 Palermo, Italy; alessandro.presentato@unipa.it (A.P.); miriam.buttacavoli@unipa.it (M.B.); valeria.alduina@unipa.it (R.A.); patrizia.cancemi@unipa.it (P.C.)

<sup>3</sup> Pharmaceutical Department, Provincial Health Authority (ASP) of Palermo, via Pindemonte 88, 90129 Palermo, Italy; agnese.ribaudò@community.unipa.it (A.R.)

\* Correspondence: giovanna.lipetri@unipa.it (G.L.P.); valeria.alduina@unipa.it (R.A.)

† These authors contributed equally to the work.

**Figure S1.** NMR spectra of new pyrrolomycins **2** and **5a-d**.

<sup>1</sup>H-NMR of (3,5-dibromo-2-methoxyphenyl)(3,4,5-tribromo-1-methyl-1H-pyrrol-2-yl)methanone (**2**)

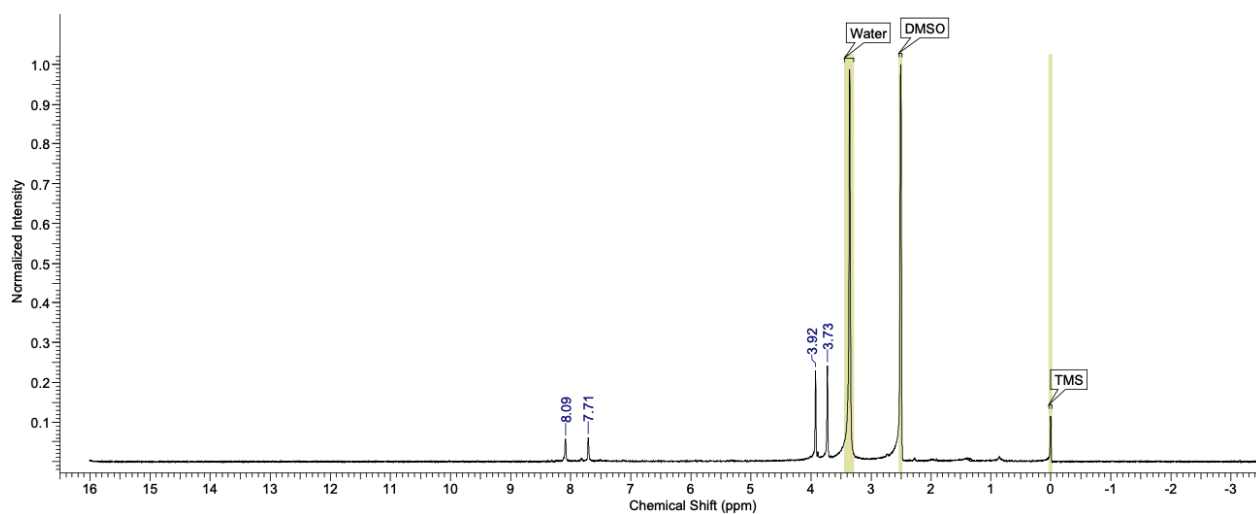

$^{13}\text{C}$ -NMR of (3,5-dibromo-2-methoxyphenyl)(3,4,5-tribromo-1-methyl-1*H*-pyrrol-2-yl)methanone (2)

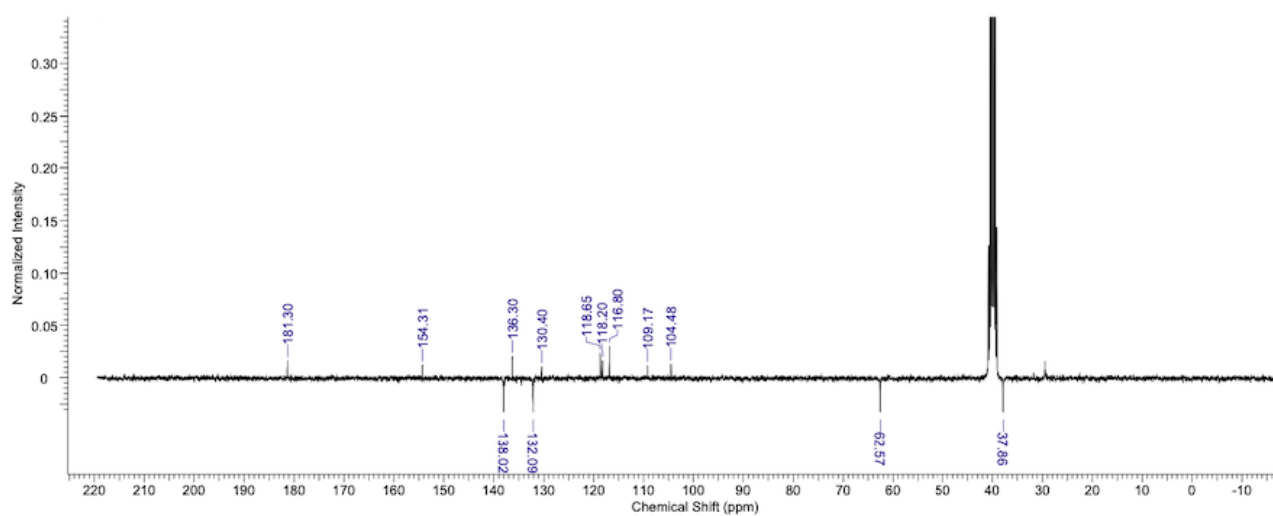

$^1\text{H}$ -NMR of (3,5-dichloro-2-hydroxyphenyl)(4-nitro-1*H*-pyrrol-2-yl)methanone (5a)

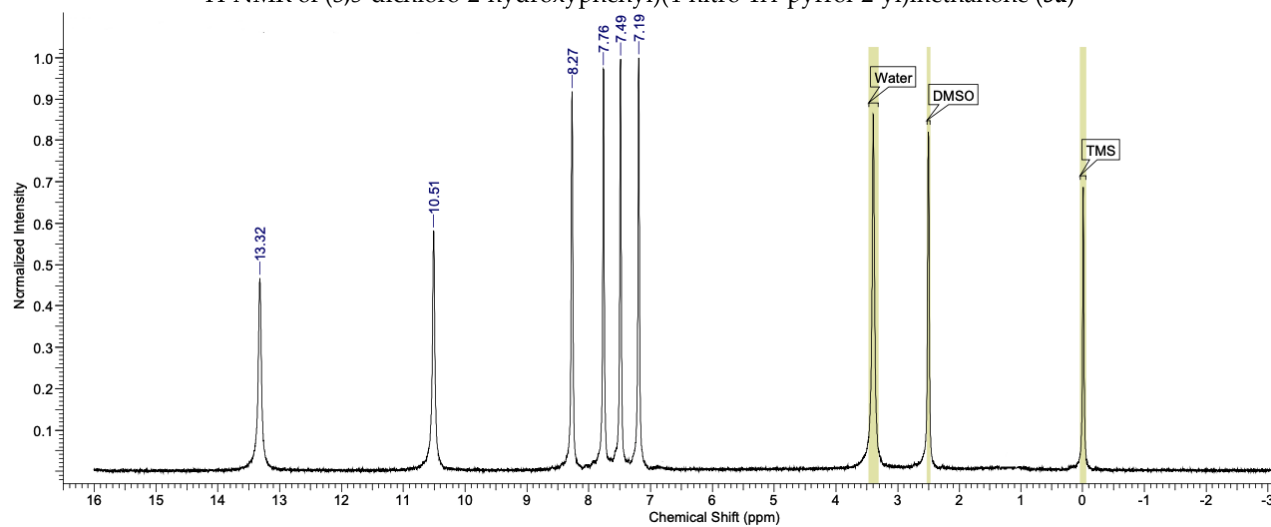

$^{13}\text{C}$ -NMR of (3,5-dichloro-2-hydroxyphenyl)(4-nitro-1*H*-pyrrol-2-yl)methanone (**5a**)

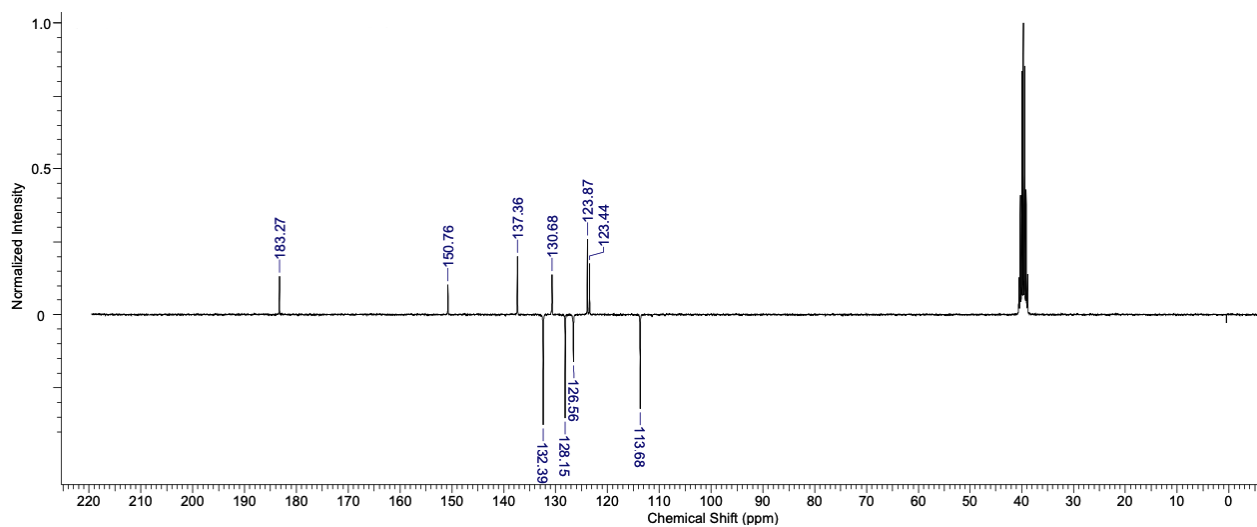

$^1\text{H}$ -NMR of (4-chloro-5-nitro-1*H*-pyrrol-2-yl)(3,5-dichloro-2-hydroxyphenyl)methanone (**5b**)

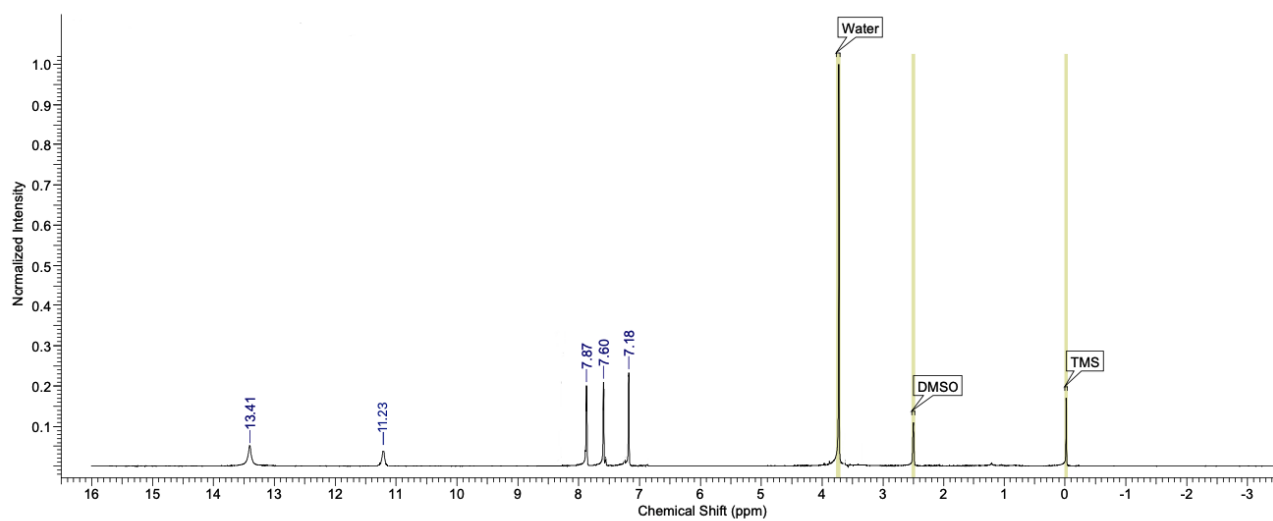

$^{13}\text{C}$ -NMR of (4-chloro-5-nitro-1*H*-pyrrol-2-yl)(3,5-dichloro-2-hydroxyphenyl)methanone (**5b**)

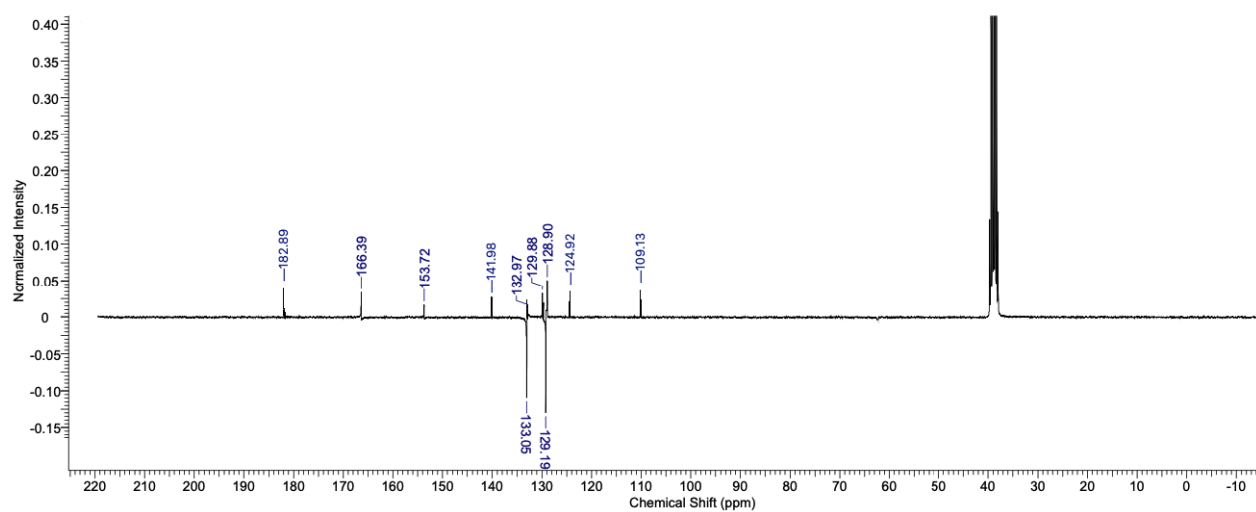

$^1\text{H}$ -NMR of (4-bromo-5-nitro-1*H*-pyrrol-2-yl)(3,5-dichloro-2-hydroxyphenyl)methanone (**5c**)

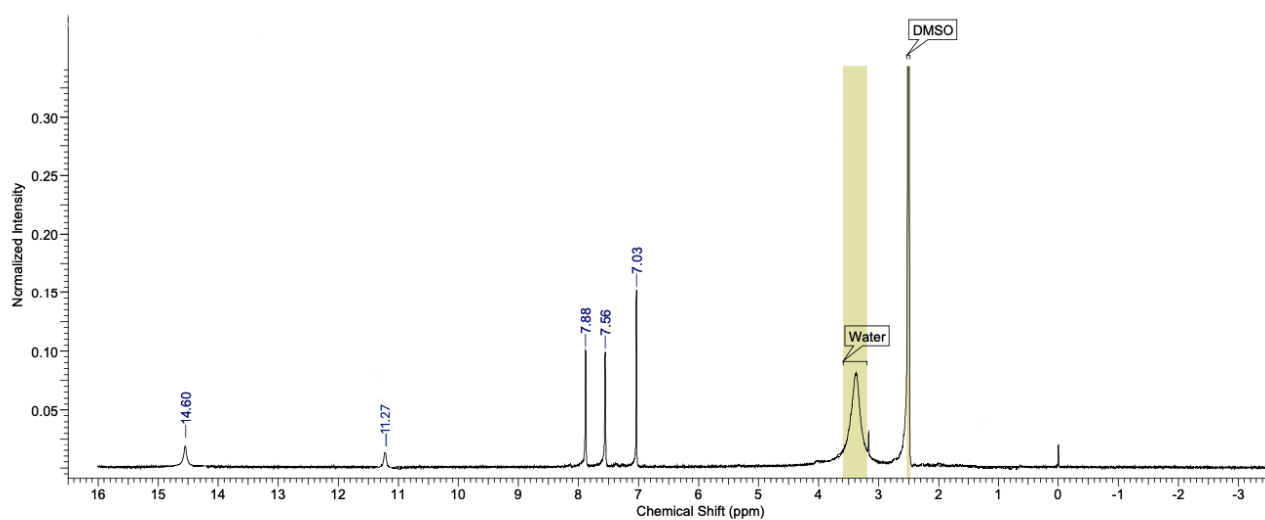

$^{13}\text{C}$ -NMR of (4-bromo-5-nitro-1*H*-pyrrol-2-yl)(3,5-dichloro-2-hydroxyphenyl)methanone (**5c**)

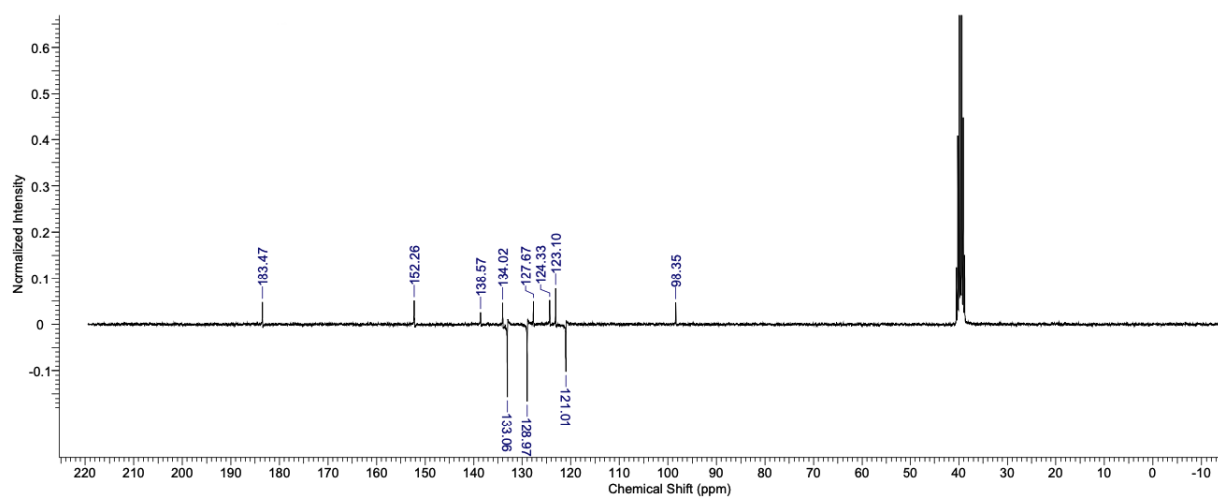

$^1\text{H}$ -NMR of (3,5-dichloro-2-hydroxyphenyl)(4,5-dichloro-3-nitro-1*H*-pyrrol-2-yl)methanone (**5d**)

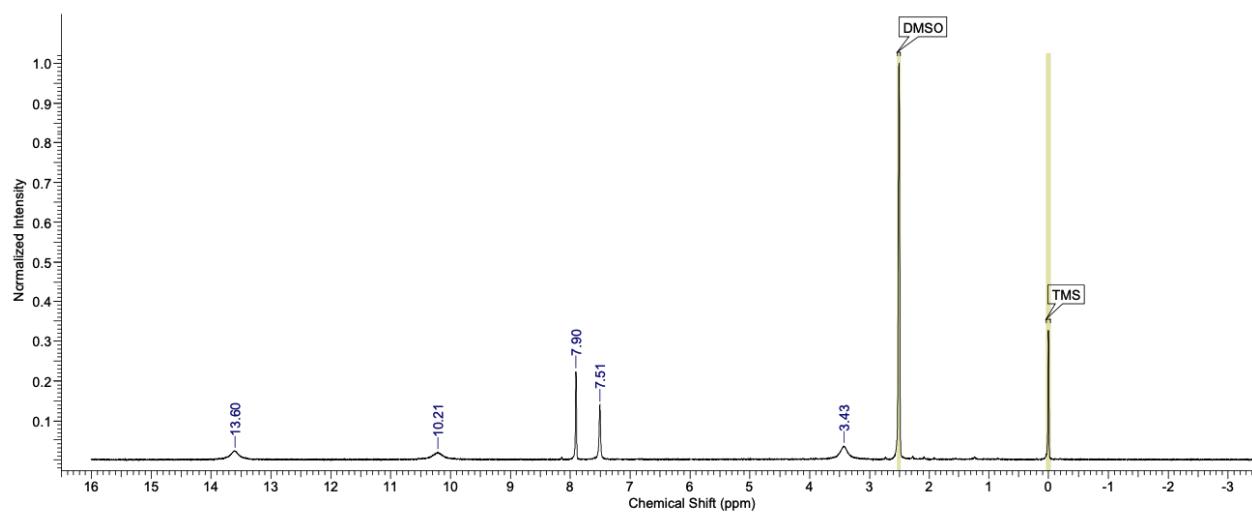

$^{13}\text{C}$ -NMR of (3,5-dichloro-2-hydroxyphenyl)(4,5-dichloro-3-nitro-1*H*-pyrrol-2-yl)methanone (**5d**)

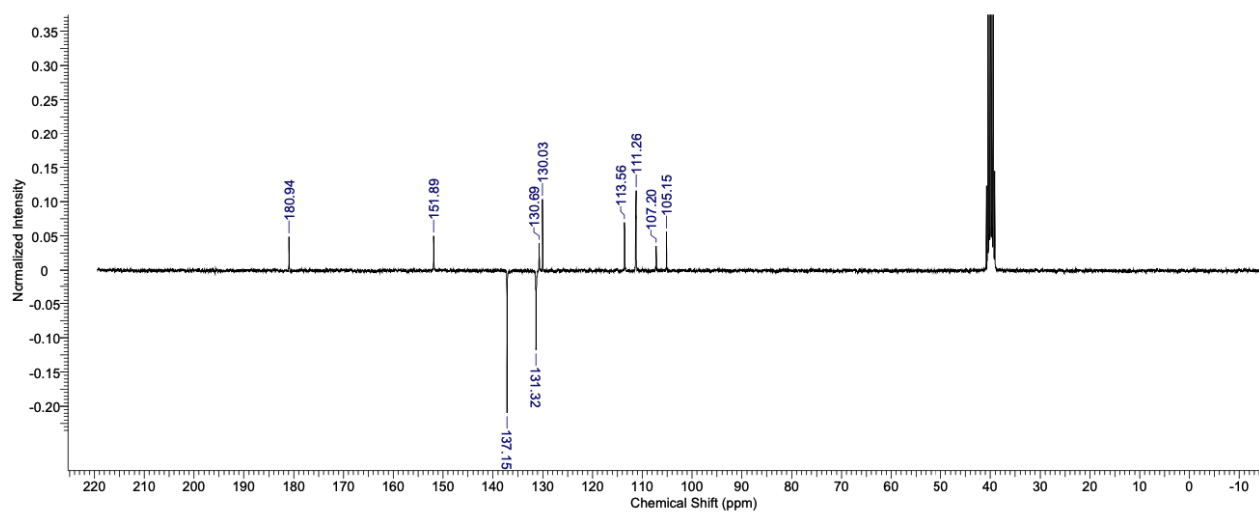

**Table S1.** MIC and MBC (expressed in  $\mu\text{M}$ ) of PM-5c, -5d and -C.

| PMs                           | MIC ( $\mu\text{M}$ ) | MBC ( $\mu\text{M}$ ) |
|-------------------------------|-----------------------|-----------------------|
| <i>Staphylococcus aureus</i>  |                       |                       |
| 5c                            | 0.5                   | 1                     |
| 5d                            | 2                     | 7.5                   |
| PM-C                          | 1                     | 90                    |
| <i>Pseudomonas aeruginosa</i> |                       |                       |
| 5d                            | >20                   | 30                    |
| PM-C                          | >40                   | >100                  |

**Table S2.** ADMET properties of the pyrrolomycins C, **1**, **2** and **5a-d** calculated by QikProp software v6.2.

|                                                                                                  | C                                                    | 1                                                    | 2                                           | 5a                                                   | 5b                                                   | 5c                                                   | 5d                                                   | Range 95% of<br>Drugs |
|--------------------------------------------------------------------------------------------------|------------------------------------------------------|------------------------------------------------------|---------------------------------------------|------------------------------------------------------|------------------------------------------------------|------------------------------------------------------|------------------------------------------------------|-----------------------|
| Primary<br>metabolites<br>& Reactive<br>functional<br>groups<br><u>Principal<br/>Descriptors</u> | Metabolism<br>likely:<br>aromatic<br>OH<br>oxidation | Metabolism<br>likely:<br>aromatic<br>OH<br>oxidation | Metabolism<br>likely: ether<br>dealkylation | Metabolism<br>likely:<br>aromatic<br>OH<br>oxidation | Metabolism<br>likely:<br>aromatic<br>OH<br>oxidation | Metabolism<br>likely:<br>aromatic<br>OH<br>oxidation | Metabolism<br>likely:<br>aromatic<br>OH<br>oxidation |                       |
| MW                                                                                               | 324.978                                              | 581.678                                              | 609.732                                     | 301.085                                              | 335.530                                              | 379.981                                              | 369.976                                              | 130.0 / 725.0         |
| Dipole<br>Moment (D)                                                                             | 1.254                                                | 1.867                                                | 2.701                                       | 4.980                                                | 5.428                                                | 6.658                                                | 11.344                                               | 1.0 / 12.5            |
| Total SASA                                                                                       | 496.448                                              | 528.172                                              | 561.220                                     | 488.735                                              | 506.239                                              | 515.745                                              | 526.880                                              | 300.0 / 1000.0        |
| Hydrophobic<br>SASA                                                                              | 0.000                                                | 0.000                                                | 141.227                                     | 0.000                                                | 0.000                                                | 0.000                                                | 0.000                                                | 0.0 / 750.0           |
| Hydrophilic<br>SASA                                                                              | 93.048                                               | 91.667                                               | 14.850                                      | 197.867                                              | 163.803                                              | 184.674                                              | 153.812                                              | 7.0 / 330.0           |
| Carbon Pi<br>SASA                                                                                | 121.461                                              | 92.720                                               | 82.449                                      | 152.468                                              | 138.433                                              | 121.469                                              | 100.342                                              | 0.0 / 450.0           |
| Weakly<br>Polar SASA                                                                             | 281.939                                              | 343.785                                              | 322.694                                     | 138.400                                              | 204.002                                              | 209.602                                              | 272.726                                              | 0.0 / 175.0           |
| Molecular<br>Volume<br>( $\text{\AA}^3$ )                                                        | 817.470                                              | 891.061                                              | 989.632                                     | 804.835                                              | 842.621                                              | 854.696                                              | 883.605                                              | 500.0 / 2000.0        |
| vdW Polar<br>SA (PSA)                                                                            | 57.549                                               | 57.881                                               | 30.538                                      | 103.739                                              | 97.854                                               | 101.840                                              | 97.648                                               | 7.0 / 200.0           |
| No. of<br>Rotatable<br>Bonds                                                                     | 3.000                                                | 3.000                                                | 3.000                                       | 4.000                                                | 4.000                                                | 4.000                                                | 4.000                                                | 0.0 / 15.0            |
| HB Donor                                                                                         | 1.000                                                | 1.000                                                | 0.000                                       | 1.000                                                | 1.000                                                | 1.000                                                | 1.000                                                | 0.0 / 6.0             |
| HB Acceptor                                                                                      | 1.750                                                | 1.750                                                | 2.750                                       | 2.750                                                | 2.750                                                | 2.750                                                | 2.750                                                | 2.0 / 20.0            |
| Globularity<br>(Sphere = 1)                                                                      | 0.852                                                | 0.848                                                | 0.856                                       | 0.856                                                | 0.852                                                | 0.845                                                | 0.845                                                | 0.75 / 0.95           |
| Ionization<br>Potential<br>(eV)                                                                  | 9.136                                                | 9.631                                                | 9.579                                       | 9.549                                                | 9.755                                                | 9.641                                                | 9.682                                                | 7.9 / 10.5            |
| Electron<br>Affinity (eV)                                                                        | 0.765                                                | 1.030                                                | 1.083                                       | 1.029                                                | 1.472                                                | 1.477                                                | 1.389                                                | -0.9 / 1.7            |
| <u>Properties<br/>Predictions</u>                                                                |                                                      |                                                      |                                             |                                                      |                                                      |                                                      |                                                      |                       |
| Polarizability<br>( $\text{\AA}^3$ )                                                             | 25.795                                               | 28.465                                               | 32.312                                      | 24.943                                               | 26.321                                               | 26.643                                               | 27.598                                               | 13.0 / 70.0           |
| cLogPC16                                                                                         | 9.423                                                | 10.376                                               | 10.384                                      | 9.263                                                | 9.752                                                | 9.906                                                | 10.281                                               | 4.0 / 18.0            |

|                                                                                                 |        |         |         |        |        |        |        |                                    |
|-------------------------------------------------------------------------------------------------|--------|---------|---------|--------|--------|--------|--------|------------------------------------|
| cLogPoct                                                                                        | 11.702 | 12.919  | 12.945  | 12.175 | 12.843 | 13.270 | 15.023 | 8.0 / 35.0                         |
| cLogPw                                                                                          | 4.998  | 4.891   | 3.892   | 6.618  | 6.356  | 6.407  | 6.102  | 4.0 / 45.0                         |
| cLogPo/w                                                                                        | 4.476  | 4.889   | 5.637   | 2.496  | 3.200  | 3.132  | 3.746  | -2.0 / 6.5                         |
| cLogS                                                                                           | -5.031 | -6.250  |         | -4.126 | -4.744 | -4.945 | -5.419 | -6.5 / 0.5                         |
| CicLogS                                                                                         | -5.748 | -11.141 | -6.331  | -4.869 | -5.577 | -6.498 | -6.290 | -6.5 / 0.5                         |
| cLogKhsa                                                                                        | 0.364  | 0.568   | -11.405 | 0.108  | 0.209  | 0.240  | 0.319  | -1.5 / 1.5                         |
| cLogBB                                                                                          | 0.219  | 0.376   | 0.628   | -1.138 | -0.681 | -0.890 | -0.444 | -3.0 / 1.2                         |
| No. of<br>Primary<br>Metabolites                                                                | 1      | 1       | 1.039   | 1      | 1      | 1      | 1      | 1.0 / 8.0                          |
| CNS Activity                                                                                    | +      | +       | 1       | --     | +/-    | -      | +/-    | - - (inactive)<br>++ (active)      |
| cLogHERG                                                                                        | -4.511 | -4.436  | ++      | -4.586 | -4.583 | -4.627 | -4.515 | concern below -5                   |
| cPCaco                                                                                          | 1298   | 1338    | -4.259  | 131    | 277    | 175    | 344    | < 25 poor<br>> 500 great           |
| cPMDCK                                                                                          | 10000  | 10000   | 7162    | 316    | 1619   | 1061   | 4877   | < 25 poor<br>> 500 great           |
| clogKp<br>Jm, max<br>transdermal<br>transport<br>rate                                           | -2.518 | -2.594  | 10000   | -4.245 | -3.667 | -4.111 | -3.617 | Kp in cm/hr                        |
| Percent<br>Human Oral<br>Absorption<br>±20%                                                     | 0.004  | 0.001   | -1.215  | 0.001  | 0.001  | 0.000  | 0.000  | micrograms/cm <sup>2</sup> -<br>hr |
| Jorgensen<br>Rule                                                                               | 100    | 100     | 100     | 79     | 89     | 85     | 94     | < 25% poor                         |
| Lipinski Rule                                                                                   | 0      | 1       | 1       | 0      | 0      | 0      | 0      | maximum 3                          |
| Qual. Model<br>for Human<br>Oral<br>Absorption<br># Stars<br>(violation of<br>the 95%<br>range) | 0      | 1       | 2       | 0      | 0      | 0      | 0      | maximum 4                          |
|                                                                                                 | High   | Low     | Low     | High   | High   | High   | High   | >80% is high                       |
|                                                                                                 | 2      | 2       | 2       | 0      | 1      | 1      | 1      | 0-5                                |

**Principal Descriptors.** MW: molecular weight of the molecule. **Dipole Moment (D):** computed dipole moment of the molecule. **Total SASA:** total solvent accessible surface area (SASA) in square angstroms using a probe with a 1.4 Å radius. **Hydrophobic SASA:** hydrophobic component of the SASA (saturated carbon and attached hydrogen). **Hydrophilic SASA:** hydrophilic component of the SASA (SASA on N, O, and H on heteroatoms). **Carbon Pi SASA:** (carbon and attached hydrogen) component of the SASA. **Weakly Polar SASA:** weakly polar component of the SASA (halogens, P, and S). **Molecular Volume (Å<sup>3</sup>):** total solvent-accessible volume in cubic angstroms using a probe with a 1.4 Å radius. **vdW Polar SA (PSA):** Van der Waals surface area of polar nitrogen and oxygen atoms. **No. of Rotatable Bonds:** estimated number of rotatable bonds that could influence interaction with the biological substrate. **HB Donor:** estimated number of hydrogen bonds that would be donated by the solute to water molecules in an aqueous solution. Values are averages taken over a number of configurations, so they can be non-integer. **HB Acceptor:** estimated number of hydrogen bonds that would be accepted by the solute from water molecules in an aqueous solution. Values are averages taken over a number of configurations, so they can be non-integer. **Globularity (Sphere = 1):** globularity descriptor,  $(4\pi r^2)/(SASA)$ , where  $r$  is the radius of a sphere with a volume equal to the molecular volume. Globularity is 1.0 for a spherical molecule. **Ionization Potential (eV):** PM3 calculated ionization potential. **Electron Affinity (eV):** PM3 calculated electron affinity.

**Properties Predictions.** **Polarizability (Å<sup>3</sup>):** predicted polarizability in cubic angstroms. **cLogPC16:** predicted hexadecane/gas partition coefficient. **cLogPoct:** predicted octanol/gas partition coefficient. **cLogPw:** predicted water/gas partition coefficient. **cLogPo/w:** predicted octanol/water partition coefficient. **cLogS:** predicted aqueous solubility, log S. S in mol dm<sup>-3</sup> is the concentration of the solute in a saturated solution that is in equilibrium with the crystalline solid. **CicLogS:** conformation-independent predicted aqueous solubility, log S; S in mol dm<sup>-3</sup> is the concentration of the solute in a saturated solution that is in equilibrium with the crystalline solid. **cLogKhsa:** prediction of binding to human serum albumin. **cLogBB:** predicted brain/blood partition coefficient. Note: Predictions are for orally delivered drugs. **No. of Primary Metabolites:** Number of likely metabolic reactions. **CNS Activity:** predicted central nervous system activity on a -2 (inactive) to +2 (active) scale. **cLogHERG:** predicted IC<sub>50</sub> value for blockage of HERG K<sup>+</sup> channels. **cPCaco:** Predicted

apparent Caco-2 cell permeability in nm/sec; Caco-2 cells are a model for the gut-blood barrier. Predictions are for non-active transport. **cPMDCK**: predicted apparent MDCK cell permeability in nm/sec. MDCK cells are considered to be a good mimic for the blood-brain barrier. Predictions are for non-active transport. **cLogKp**: predicted skin permeability, log K. **Jm, max transdermal transport rate**: predicted maximum transdermal transport rate. **Percent Human-Oral Absorption  $\pm 20\%$** : predicted human oral absorption on 0 to 100% scale; the prediction is based on a quantitative multiple linear regression model; the assessment uses a knowledge-based set of rules, including number of metabolites, number of rotatable bonds, logP, solubility and cell permeability. **Jorgensen Rule or Rule of Three**: number of violations of Jorgensen's rule of three. The three rules are: cLogS > -5.7, cPCaco > 22 nm/s, # Primary Metabolites < 7. Compounds with fewer (and preferably no) violations of these rules are more likely to be orally available. **Lipinski Rule or Rule of Five**: number of violations of Lipinski's rule of five. The four rules are: mol\_MW < 500, cLogPo/w < 5, HB donor  $\leq 5$ , HB acceptor  $\leq 10$ . Compounds that satisfy these rules are considered drug-like. **Qual. Model for Human Oral Absorption**: predicted qualitative human oral absorption: 1, 2, or 3 for low, medium, or high. **#Stars (violation of the 95% range)**: number of property or descriptor values that are outside the 95% range of similar values for known drugs. A large number of stars suggests that a molecule is less drug-like than molecules with few stars.

**Table S3.** ADMET properties of the pyrrolomycins C, 1, 2 and 5a-d calculated by pkCSM – pharmacokinetics.

| <u>Properties Predictions</u> | C     | 1      | 2      | 5a     | 5b     | 5c     | 5d     |                                                |
|-------------------------------|-------|--------|--------|--------|--------|--------|--------|------------------------------------------------|
| VDss (human)                  | 0.076 | 0.119  | 0.159  | -0.138 | -0.041 | -0.025 | -0.156 | <i>Low &lt; -0.15; High &gt; 0.45 log L/kg</i> |
| Total Clearance               | 0.386 | -0.252 | -0.213 | 0.51   | 0.207  | 0.140  | 0.313  | <i>log ml/min/kg</i>                           |
| Renal OCT2 substrate          | No    | No     | No     | No     | No     | No     | Yes    | <i>Yes/No</i>                                  |
| CYP2D6 substrate              | No    | No     | No     | No     | No     | No     | No     | <i>Yes/No</i>                                  |
| CYP3A4 substrate              | No    | Yes    | Yes    | No     | No     | No     | Yes    | <i>Yes/No</i>                                  |
| CYP1A2 inhibitor              | Yes   | Yes    | Yes    | Yes    | Yes    | Yes    | Yes    | <i>Yes/No</i>                                  |
| CYP2C19 inhibitor             | Yes   | Yes    | Yes    | Yes    | Yes    | Yes    | Yes    | <i>Yes/No</i>                                  |
| CYP2C9 inhibitor              | No    | Yes    | Yes    | No     | No     | No     | No     | <i>Yes/No</i>                                  |
| CYP2D6 inhibitor              | No    | No     | No     | No     | No     | No     | No     | <i>Yes/No</i>                                  |
| CYP3A4 inhibitor              | No    | Yes    | No     | No     | No     | No     | No     | <i>Yes/No</i>                                  |

**Properties Predictions.** VDss: predicted steady state volume of distribution in human. **Total Clearance**: predicted drug clearance as a combination of hepatic and renal clearance. **Renal OCT2 substrate**: prediction of binding to Organic Cation Transporter 2. **CYP2D6/CYP3A4 substrate**: prediction of binding to CYP2D6/CYP3A4. **CYP1A2/CYP2C19/CYP2D6/CYP3A4 inhibitors**: 1A2/2C19/2D6/3A4 inhibition predictions.
